# Supplementary material for: Urinary mRNA biomarker panel for the detection of urothelial carcinoma
Source: PubMed Central journal article supplement (PMC5122424; doi:10.18632/oncotarget.9587), 2016-05-25
Supplement: oncotarget-07-38731-s001.pdf [file oncotarget-07-38731-s001.pdf]

## **Urinary mRNA biomarker panel for the detection of urothelial carcinoma**

### **SUPPLEMENTARY TABLES**

**Supplementary Table S1: Univariate results for testing the association of each of the 44 candidate biomarkers with case-control status.**

See Supplementary File 1

**Supplementary Table S2: Association of biomarkers with clinical variables.**

See Supplementary File 2
